# Supplementary material for: Robotic-Assisted Ivor Lewis Esophagectomy Is Safe and Cost Equivalent Compared to Minimally Invasive Esophagectomy in a Tertiary Referral Center
Source: MDPI journal article supplement (doi:10.3390/cancers16010112), 2023-12-25
Supplement: s1 [file s1]

## Supplementary Materials

**Table S1.** Multivariate analysis of factors associated with increased total costs in 37 patients who underwent RAMIE for EC or cancer of the GEJ.

| Parameters                                                | UV                          |                             | MV           |              | Total cost/stay, €, median (range) <sup>%</sup> |
|-----------------------------------------------------------|-----------------------------|-----------------------------|--------------|--------------|-------------------------------------------------|
|                                                           | <36,826 € per case (n = 27) | ≥36,826 € per case (n = 10) | P            | HR (95 % CI) |                                                 |
| Male sex, n (%)                                           | 25 (93)                     | 7 (70)                      | 0.110        |              |                                                 |
| Age ≥65 years, n (%)                                      | 11 (41)                     | 6 (60)                      | 0.460        |              |                                                 |
| BMI ≥30 kg/m <sup>2</sup> , n (%)                         | 3 (11)                      | 1 (10)                      | 1            |              |                                                 |
| ASA score ≥3, n (%)                                       | 13 (50)                     | 7 (70)                      | 0.456        |              |                                                 |
| Length of procedure ≥421 minutes <sup>&amp;</sup> , n (%) | 13 (48)                     | 6 (69)                      | 0.714        |              |                                                 |
| Readmission to ICU, n (%)                                 | 2 (7)                       | 5 (50)                      | <b>0.009</b> |              | NS                                              |
| Length of ICU stay ≥4 days <sup>&amp;</sup> , n (%)       | 16 (59)                     | 5 (50)                      | 0.716        |              |                                                 |
| Length of hospital stay ≥15 days <sup>&amp;</sup> , n (%) | 11 (41)                     | 9 (90)                      | <b>0.010</b> |              | NS                                              |
| Anastomotic leak, n (%)                                   | 1 (4)                       | 3 (30)                      | <b>0.052</b> |              | NS                                              |
| Postoperative pneumonia, n (%)                            | 1 (4)                       | 2 (20)                      | 0.172        |              |                                                 |

UV, univariate analysis; MV, multivariate analysis; BMI, body-mass index; ASA, American Society of Anesthesiologists; ICU, intensive care unit; NS, not significant; &, median of whole cohort; %, refers to median total cost per stay in the subgroup in which the parameter applies

**Table S2.** Multivariate analysis of factors associated with increased total costs in 91 patients who underwent MIE for EC or cancer of the GEJ.

| Parameters                                                | UV                          |                             | MV               |                  | Total cost/stay, €, median (range) <sup>%</sup> |
|-----------------------------------------------------------|-----------------------------|-----------------------------|------------------|------------------|-------------------------------------------------|
|                                                           | <47,166 € per case (n = 67) | ≥47,166 € per case (n = 22) | P                | HR (95 % CI)     |                                                 |
| Male sex, n (%)                                           | 56 (82)                     | 19 (83)                     | 1                |                  |                                                 |
| Age ≥65 years, n (%)                                      | 25 (37)                     | 13 (57)                     | <b>0.097</b>     |                  | NS                                              |
| BMI ≥30 kg/m <sup>2</sup> , n (%)                         | 12 (18)                     | 3 (14)                      | 0.752            |                  |                                                 |
| ASA score ≥3, n (%)                                       | 35 (52)                     | 14 (64)                     | 0.351            |                  |                                                 |
| Length of procedure ≥372 minutes <sup>&amp;</sup> , n (%) | 37 (54)                     | 9 (39)                      | 0.205            |                  |                                                 |
| Readmission to ICU, n (%)                                 | 7 (10)                      | 14 (61)                     | <b>&lt;0.001</b> |                  | NS                                              |
| Length of ICU stay ≥3 days <sup>&amp;</sup> , n (%)       | 42 (62)                     | 22 (96)                     | <b>0.002</b>     | 20.9 (1.6-278.8) | <b>0.021</b><br>32,634<br>(19,666-303,453)      |
| Length of hospital stay ≥17 days <sup>&amp;</sup> , n (%) | 25 (37)                     | 23 (100)                    | <b>&lt;0.001</b> |                  | NS                                              |
| Anastomotic leak, n (%)                                   | 2 (3)                       | 11 (48)                     | <b>&lt;0.001</b> | 10.3 (1.8-60.0)  | <b>0.009</b><br>67,434<br>(26,748-303,453)      |
| Postoperative pneumonia, n (%)                            | 9 (13)                      | 14 (61)                     | <b>&lt;0.001</b> |                  | NS                                              |

UV, univariate analysis; MV, multivariate analysis; BMI, body-mass index; ASA, American Society of Anesthesiologists; ICU, intensive care unit; NS, not significant; &, median of whole cohort; %, refers to median total cost per stay in the subgroup in which the parameter applies
